# Supplementary material
Source: ML conference proceedings conference paper supplement (https://openreview.net/forum?id=fJ924S1j5xh)
Supplement: supplementary_material [file attachment]

## 446 A Appendix

### 447 A.1 Proof of Lemma 1

448 *Proof.* The proof techniques basically follows [7]. However, since the EXP3 layer and contextual  
 449 bandit layer are coupled, the result in [7] cannot be directly applied to show our result. We make  
 450 modifications of the proofs in [7] below.

451 We first reload some notations in this proof: at time  $t$  we are given all the previous information  
 452  $\mathcal{F}_{t-1}$  generated from using our auto-tune framework shown in Algorithm 1, and then pull an arm  
 453 according to some exploration hyper-parameter  $\alpha$ . Therefore, for convenience we could safely omit  
 454  $\mathcal{F}_{t-1}$  here, and denote  $a_t(\alpha) := a_t(\alpha|\mathcal{F}_{t-1})$  and  $X_t(\alpha) := X_t(\alpha|\mathcal{F}_{t-1})$  as the arm pulled and its  
 455 corresponding feature vector at round  $t$ . Furthermore, if arm  $a_t(\alpha_j)$  is pulled at round  $t$ , we define  
 456 the corresponding mean reward as  $\mu_t(\alpha_j) = \mu(X_t(\alpha_j)^T \theta)$ . The corresponding observed sample  
 457 reward is  $y_t(\alpha_j) = \mu_t(\alpha_j) + \epsilon_{t,j}$ , where  $\epsilon_{t,j}$  denotes the hypothetical random noise at round  $t$  if arm  
 458  $a_t(\alpha_j)$  is pulled. Note that  $\epsilon_t = \epsilon_{t,i_t}$  since  $a_t(\alpha_{i_t})$  is the arm pulled by our algorithm and  $\epsilon_t$  is the  
 459 associated random noise. By definition,  $Y_t = y_t(\alpha_{i_t})$ . From the definition of  $\hat{y}_t(j)$  in Algorithm 1,  
 460 we have  $\hat{y}_t(j) = y_t(\alpha_j)/p_j(t)$  if  $j = i_t$ . Otherwise  $\hat{y}_t(j) = 0$ . Then  $w_j(t+1) = w_j(t)\exp(\frac{\beta}{n}\hat{y}_t(i))$   
 461 according to Algorithm 1.

462 Given all the information in the past  $\mathcal{F}_{t-1}$ ,  $(\hat{\theta}_t, V_t, p_j(t), w_j(t))$  are fixed. Since  $0 \leq y_t(\alpha_j) \leq 1$ ,  
 463 we have

$$\mathbb{E} \left[ \sum_{i=1}^n p_i(t) \hat{y}_t(i) | \mathcal{F}_{t-1} \right] = \mathbb{E} \left[ p_{i_t}(t) \frac{y_t(\alpha_{i_t})}{p_{i_t}(t)} | \mathcal{F}_{t-1} \right] = \mathbb{E} [\mu_t(\alpha_{i_t}) | \mathcal{F}_{t-1}] \quad (4)$$

$$\begin{aligned} \mathbb{E} \left[ \sum_{i=1}^n p_i(t) \hat{y}_t(i)^2 | \mathcal{F}_{t-1} \right] &= \mathbb{E} \left[ p_{i_t}(t) \frac{y_t(\alpha_{i_t})}{p_{i_t}(t)} \hat{y}_t(i_t) | \mathcal{F}_{t-1} \right] = \mathbb{E} [y_t(\alpha_{i_t}) \hat{y}_t(i_t) | \mathcal{F}_{t-1}] \\ &\leq \mathbb{E} [\hat{y}_t(i_t) | \mathcal{F}_{t-1}] = \mathbb{E} \left[ \sum_{i=1}^n \hat{y}_t(i) | \mathcal{F}_{t-1} \right] \end{aligned} \quad (5)$$

$$= \sum_{i=1}^n \mathbb{E} [\mathbb{E} [\hat{y}_t(i) | \sigma(\mathcal{F}_{t-1}, \epsilon_{t,i}, a_t(\alpha_i))] | \mathcal{F}_{t-1}] \quad (6)$$

$$= \sum_{i=1}^n \mathbb{E} [y_t(\alpha_i) | \mathcal{F}_{t-1}] \quad (7)$$

$$= \sum_{i=1}^n \mathbb{E} [\mu_t(\alpha_i) | \mathcal{F}_{t-1}]. \quad (8)$$

464 Equation 5 holds since  $\hat{y}_t(i) \neq 0$  only when  $i = i_t$ . In Equation 6,  $\sigma(\mathcal{F}_{t-1}, \epsilon_{t,i}, a_t(\alpha_i))$  is the smallest  
 465  $\sigma$ -algebra induced by  $\mathcal{F}_{t-1}$ ,  $\epsilon_{t,i}$ , and  $a_t(\alpha_i)$ . Equation 7 holds since  $\hat{y}_t(i) = y_t(\alpha_i)/p_i(t) \mathbb{1}(i = i_t)$ .  
 466 Meanwhile, since given the hyper-parameter to be used at round  $t$  as  $\alpha_{i_t}$ , the arm to be pulled  $a_t(\alpha_{i_t})$   
 467 follows a fixed distribution and does not affect the distribution of  $i_t$ , so  $i = i_t$  is still with probability  
 468  $p_i(t)$ . Now we are ready to use the above results to prove the lemma. Define  $W_t = \sum_{i=1}^n w_i(t)$ . We  
 469 find the lower bound and upper bound of  $\mathbb{E}[\log \frac{W_{T+1}}{W_1}]$  below.

470 **Lower bound.** Since  $w_i(1) = 1$  for all  $i$ ,  $\mathbb{E}[\log \frac{W_{T+1}}{W_1}] \geq \mathbb{E}[\log w_i(T+1)] - \log n$  for all  $i \in [n]$ .

471 We take a look at  $\mathbb{E} \left[ \log \frac{w_i(t+1)}{w_i(t)} \right]$  below.

$$\begin{aligned} \mathbb{E} \left[ \log \frac{w_i(t+1)}{w_i(t)} | \mathcal{F}_{t-1} \right] &= \mathbb{E} \left[ \log \left[ \frac{w_i(t)}{w_i(t)} \exp \left( \frac{\beta}{n} \hat{y}_t(i) \right) \right] | \mathcal{F}_{t-1} \right] \\ &= \mathbb{E} \left[ \frac{\beta}{n} \hat{y}_t(i) | \mathcal{F}_{t-1} \right] = \mathbb{E} \left[ \frac{\beta}{n} y_t(i) | \mathcal{F}_{t-1} \right] = \mathbb{E} \left[ \frac{\beta}{n} \mu_t(\alpha_i) | \mathcal{F}_{t-1} \right] \end{aligned}$$

472 The third “=” in the above is due to the same reason as in Equation 7. Take expectation on both sides  
 473 and sum over  $t$ , we get

$$\mathbb{E}[\log w_i(T+1)] = \frac{\beta}{n} \sum_{t=1}^T \mathbb{E}[\mu_t(\alpha_i)]$$

474 Therefore, for all  $i = 1, \dots, n$ ,

$$\mathbb{E}\left[\log \frac{W_{T+1}}{W_1}\right] \geq \frac{\beta}{n} \sum_{t=1}^T \mathbb{E}[\mu_t(\alpha_i)] - \log n. \quad (9)$$

475 **Upper bound.** On the other hand, let's look at  $\mathbb{E}[\log \frac{W_{t+1}}{W_t}]$ :

$$\begin{aligned} \mathbb{E}\left[\log \frac{W_{t+1}}{W_t} \middle| \mathcal{F}_{t-1}\right] &= \mathbb{E}\left[\log \sum_{i=1}^n \frac{w_i(t+1)}{W_t} \middle| \mathcal{F}_{t-1}\right] = \mathbb{E}\left[\log \sum_{i=1}^n \frac{w_i(t)}{W_t} \exp\left(\frac{\beta}{n} \hat{y}_t(i)\right) \middle| \mathcal{F}_{t-1}\right] \\ &= \mathbb{E}\left[\log \sum_{i=1}^n \frac{p_i(t) - \frac{\beta}{n}}{1 - \beta} \exp\left(\frac{\beta}{n} \hat{y}_t(i)\right) \middle| \mathcal{F}_{t-1}\right] \quad \text{definition of } p_i(t) \\ &\leq \mathbb{E}\left[\log \sum_{i=1}^n \frac{p_i(t) - \frac{\beta}{n}}{1 - \beta} \left(1 + \frac{\beta}{n} \hat{y}_t(i) + \frac{(e-2)\beta^2}{n^2} \hat{y}_t(i)^2\right) \middle| \mathcal{F}_{t-1}\right] \\ &\leq \mathbb{E}\left[\log \left(1 + \sum_{i=1}^n \left[\frac{\beta}{n(1-\beta)} p_i(t) \hat{y}_t(i) + \frac{(e-2)\beta^2}{n^2(1-\beta)} p_i(t) \hat{y}_t(i)^2\right]\right) \middle| \mathcal{F}_{t-1}\right] \\ &\leq \mathbb{E}\left[\sum_{i=1}^n \left(\frac{\beta}{n(1-\beta)} p_i(t) \hat{y}_t(i) + \frac{(e-2)\beta^2}{n^2(1-\beta)} p_i(t) \hat{y}_t(i)^2 \middle| \mathcal{F}_{t-1}\right)\right] \\ &\leq \frac{\beta}{n(1-\beta)} \mathbb{E}[\mu_t(\alpha_i) | \mathcal{F}_{t-1}] + \frac{(e-2)\beta^2}{n^2(1-\beta)} \sum_{i=1}^n \mathbb{E}[\mu_t(\alpha_i) | \mathcal{F}_{t-1}]. \end{aligned}$$

476 The first inequality in the above holds since  $e^x \leq 1 + x + (e-2)x^2$  for  $x \in [0, 1]$ . Here, we have  
 477  $0 \leq \frac{\beta}{n} \hat{y}_t(i) \leq 1$  because  $p_i(t) \geq \frac{\beta}{n}$  and  $0 \leq y_t(\alpha_i) \leq 1$ . The third inequality “ $\leq$ ” in the above  
 478 holds since  $\log(1+x) \leq x$  when  $x \geq 0$ . The last inequality is from Equation 4, 8. Take another  
 479 expectation on both sides, we get

$$\mathbb{E}\left[\log \frac{W_{t+1}}{W_t}\right] \leq \frac{\beta}{n(1-\beta)} \mathbb{E}[\mu_t(\alpha_i)] + \frac{(e-2)\beta^2}{n^2(1-\beta)} \sum_{i=1}^n \mathbb{E}[\mu_t(\alpha_i)]$$

480 By summing the above over  $t$ , we have

$$\mathbb{E}\left[\log \frac{W_{T+1}}{W_1}\right] \leq \frac{\beta}{n(1-\beta)} \sum_{t=1}^T \mathbb{E}[\mu_t(\alpha_i)] + \frac{(e-2)\beta^2}{n^2(1-\beta)} \sum_{t=1}^T \sum_{i=1}^n \mathbb{E}[\mu_t(\alpha_i)] \quad (10)$$

481 Combining the lower bound (Equation 9) and upper bound (Equation 10) of  $\mathbb{E}\left[\log \frac{W_{T+1}}{W_1}\right]$ , we get  
 482 for every  $i = 1, \dots, n$ ,

$$\frac{\beta}{n} \sum_{t=1}^T \mathbb{E}[\mu_t(\alpha_i)] - \log n \leq \frac{\beta}{n(1-\beta)} \sum_{t=1}^T \mathbb{E}[\mu_t(\alpha_i)] + \frac{(e-2)\beta^2}{n^2(1-\beta)} \sum_{t=1}^T \sum_{i=1}^n \mathbb{E}[\mu_t(\alpha_i)] \quad (11)$$

483 Let

$$G_{\max} = \max_{i \in [n]} \sum_{t=1}^T \mathbb{E}[\mu_t(\alpha_i)]$$

484 Since Equation 11 holds for any  $i$ , we have

$$\frac{\beta}{n} G_{\max} - \log n \leq \frac{\beta}{n(1-\beta)} \sum_{t=1}^T \mathbb{E}[\mu_t(\alpha_i)] + \frac{(e-2)\beta^2}{n(1-\beta)} G_{\max} \quad (12)$$

Equation 12 can be further simplified as

$$G_{\max} - \sum_{t=1}^T \mathbb{E} [\mu_t(\alpha_{i_t})] \leq (e-1)\beta G_{\max} + \frac{(1-\beta)n \log n}{\beta}$$

Since we choose  $\beta = \min \left\{ 1, \sqrt{\frac{n \log n}{(e-1)T}} \right\}$  and note that  $G_{\max} \leq T$ , we get

$$G_{\max} - \sum_{t=1}^T \mathbb{E} [\mu_t(\alpha_{i_t})] \leq 2\sqrt{(e-1)Tn \log n} = \tilde{O}(\sqrt{nT}).$$

□

## A.2 Proof of Theorem 1

To bound the cumulative regret, we only need to bound Quantity (A) and then combine the results in Lemma 1. In the following, we first list some useful lemmas for bounding Quantity (A) for completeness.

### A.2.1 Useful Lemmas

**Lemma 2** (Proposition 1 in [18]). *Define  $V_{n+1} = \sum_{t=1}^n X_t X_t^T$ , where  $X_t$  is drawn IID from some distribution in unit ball  $\mathbb{B}^d$ . Furthermore, let  $\Sigma := E[X_t X_t^T]$  be the second moment matrix, let  $B, \delta_2 > 0$  be two positive constants. Then there exists positive, universal constants  $C_1$  and  $C_2$  such that  $\lambda_{\min}(V_{n+1}) \geq B$  with probability at least  $1 - \delta_2$ , as long as*

$$n \geq \left( \frac{C_1 \sqrt{d} + C_2 \sqrt{\log(1/\delta_2)}}{\lambda_{\min}(\Sigma)} \right)^2 + \frac{2B}{\lambda_{\min}(\Sigma)}.$$

**Lemma 3** (Theorem 2 in [1]). *For any  $\delta < 1$ , under our problem setting in Section 3, it holds that for all  $t > 0$ ,*

$$\begin{aligned} \|\hat{\theta}_t - \theta^*\|_{V_t} &\leq \beta_t(\delta), \\ \forall x \in \mathbb{R}^d, |x^\top (\hat{\theta}_t - \theta^*)| &\leq \|x\|_{V_t^{-1}} \beta_t(\delta), \end{aligned}$$

with probability at least  $1 - \delta$ , where

$$\beta_t(\delta) = \sigma \sqrt{\log \left( \frac{(\lambda + t)^d}{\delta^2 \lambda^d} \right)} + \sqrt{\lambda} S.$$

In this subsection we denote  $\alpha^*(\delta) := \beta_T(\delta)$ .

**Lemma 4** ([15]). *Let  $\lambda > 0$ , and  $\{x_i\}_{i=1}^t$  be a sequence in  $\mathbb{R}^d$  with  $\|x_i\| \leq 1$ , then we have*

$$\begin{aligned} \sum_{s=1}^t \|x_s\|_{V_s^{-1}}^2 &\leq 2 \log \left( \frac{\det(V_{t+1})}{\det(\lambda I)} \right) \leq 2d \log \left( 1 + \frac{t}{\lambda} \right), \\ \sum_{s=1}^t \|x_s\|_{V_s^{-1}} &\leq \sqrt{T \left( \sum_{s=1}^t \|x_s\|_{V_s^{-1}}^2 \right)} \leq \sqrt{2dt \log \left( 1 + \frac{t}{\lambda} \right)}. \end{aligned}$$

**Lemma 5** ([5]). *For a Gaussian random variable  $Z$  with mean  $m$  and variance  $\sigma^2$ , for any  $z \geq 1$ ,*

$$P(|Z - m| \geq z\sigma) \leq \frac{1}{\sqrt{\pi}z} e^{-z^2/2}.$$

## 501 A.2.2 Formal Proof

*Proof.* (1). Here we would use LinUCB and LinTS for the detailed proof, and note that regret bound of all other UCB and TS algorithms could be similarly deduced. Since  $\alpha^*$  in our regret decomposition could be arbitrary element in  $J$ , here we simply take  $\alpha^* = \min_{\alpha \in J} \alpha$ . For LinUCB, since the Lemma 3 holds for any sequence  $(x_1, \dots, x_t)$ , and hence we have that with probability at least  $1 - \delta$ ,

$$\|\hat{\theta} - \theta\|_{V_t} \leq \beta_t(\delta) \leq \alpha(t, \delta),$$

where  $\alpha(T, \delta)$  is the theoretical optimal exploration rate at round  $t$  we denoted in Eqn. (3) with probability parameter  $\delta$ . And we would omit  $\delta$  for simplicity. Recall that for  $t > T_1$ , we denote the feature vector pulled at round  $t$  as  $X_t$ , i.e.

$$X_t = \operatorname{argmax}_{x \in \mathcal{A}_t} x^\top \hat{\theta}_t + \alpha_{i_t} \|x\|_{V_t^{-1}}, \quad X_t = X_t(\alpha_{i_t} | \mathcal{F}_{t-1}).$$

And we also define  $\tilde{X}_t = X_t(\alpha^* | \mathcal{F}_{t-1})$ , i.e.

$$\tilde{X}_t = \operatorname{argmax}_{x \in \mathcal{A}_t} x^\top \hat{\theta}_t + \alpha^* \|x\|_{V_t^{-1}}.$$

And it turns out that the Quantity (A) can be represented by

$$\mathbb{E} \left[ \sum_{t=T_1+1}^T (\mu(x_{t,*}^\top \theta) - \mu(X_t(\alpha^* | \mathcal{F}_{t-1})^\top \theta)) \right] = \mathbb{E} \left[ \sum_{t=T_1+1}^T (\mu(x_{t,*}^\top \theta) - \mu(\tilde{X}_t^\top \theta)) \right].$$

502 According to the proof of LinUCB we could similarly argue that

$$\begin{aligned} x_{t,*}^\top \theta - \tilde{X}_t^\top \theta &\leq \alpha^* \left( \|\tilde{X}_t\|_{V_t^{-1}} - \|\tilde{x}_{t,*}\|_{V_t^{-1}} \right) + \|x_{t,*} - \tilde{X}_t\|_{V_t^{-1}} \|\hat{\theta}_t - \theta\|_{V_t} \\ &\leq (\alpha^* + \alpha(T)) \|\tilde{X}_t\|_{V_t^{-1}} + \alpha(T) \|x_{t,*}\|_{V_t^{-1}}. \end{aligned}$$

In conclusion, we have that

$$\sum_{t=T_1+1}^T (\mu(x_{t,*}^\top \theta) - \mu(\tilde{X}_t^\top \theta)) = \tilde{O} \left( \sum_{t=T_1+1}^T \|\tilde{X}_t\|_{V_t^{-1}} + \sum_{t=T_1+1}^T \|x_{t,*}\|_{V_t^{-1}} \right).$$

By Lemma 4 and choosing  $T_1 = T^{2/3}$ , it holds that,

$$\sum_{t=T_1+1}^T \|x_{t,*}\|_{V_t^{-1}}, \quad \sum_{t=T_1+1}^T \|\tilde{X}_t\|_{V_t^{-1}} = O(T \times T^{-1/3}) = O(T^{2/3}).$$

Secondly, According to [5], we know that for LinTS we have that

$$\mathbb{E} \left[ \sum_{t=T_1+1}^T (\mu(x_{t,*}^\top \theta) - \mu(\tilde{X}_t^\top \theta)) \right] = \tilde{O} \left( \sum_{t=T_1+1}^T \|\tilde{X}_t\|_{V_t^{-1}} + \|x_{t,*}\|_{V_t^{-1}} \right).$$

503 But for completeness we still offer an alternative proof for this equality:

$$\begin{aligned} \tilde{X}_t^\top \hat{\theta}_t + \alpha^* \|\tilde{X}_t\|_{V_t^{-1}} Z_t &\geq x_{t,*}^\top \theta + \alpha^* \|x_{t,*}\|_{V_t^{-1}} Z_{t,*} + x_{t,*}^\top (\hat{\theta}_t - \theta) \\ &\geq x_{t,*}^\top \theta + \alpha^* \|x_{t,*}\|_{V_t^{-1}} Z_{t,*} + \|x_{t,*}\|_{V_t^{-1}} \|\hat{\theta}_t - \theta\|_{V_t} \\ &\geq x_{t,*}^\top \theta + (\alpha^* Z_{t,*} - \alpha(T)) \|x_{t,*}\|_{V_t^{-1}}, \end{aligned}$$

504 where  $Z_t$  and  $Z_{t,*}$  are IID normal random variables,  $\forall t$ . Therefore, it holds that,

$$\begin{aligned} \tilde{X}_t^\top \theta &\geq x_{t,*}^\top \theta + (\alpha^* Z_{t,*} - \alpha(T)) \|x_{t,*}\|_{V_t^{-1}} - \alpha^* \|X_t\|_{V_t^{-1}} Z_t + X_t^\top (\theta - \hat{\theta}_t), \\ (x_{t,*} - X_t)^\top \theta &\leq (\alpha(T) + \alpha^* Z_t) \|X_t\|_{V_t^{-1}} + (\alpha(T) - \alpha^* Z_{t,*}) \|x_{t,*}\|_{V_t^{-1}} = K_t, \end{aligned}$$

where  $K_t$  is normal random variable with

$$\mathbb{E}(K_t) \leq 2\alpha(T)T^{-1/3}, \quad \text{SD}(K_t) \leq \sqrt{2}\alpha^*T^{-1/3}.$$

Consequently, we have

$$\begin{aligned} \sum_{t=T_1+1}^T \left( x_{t,*}^\top \theta - \tilde{X}_t^\top \theta \right) &\leq \sum_{t=T_1+1}^T K_t := K \\ \mathbb{E}(K) &= 2\alpha(T)T^{2/3} = \tilde{O}(T^{4/7}), \quad \text{SD}(K) \leq \sqrt{2}\alpha^*T^{1/6} = O(T^{1/6}). \end{aligned}$$

We have

$$P(K > (2\alpha^* + \sqrt{2})T^{2/3}) \leq \frac{1}{c\sqrt{\pi}\sqrt{T}} e^{-c^2 T/2}.$$

This probability upper bound is ultra small and hence negligible. Therefore, we not only prove the expected cumulative regret could be controlled, but also provide a probability bound.

Note we could use this procedure to bound the regret for other UCB and TS bandit algorithms, since most of the proofs for generalized linear bandits are closely related to the rate of  $\sum_{t=T_1+1}^T \|\tilde{X}_t\|_{V_t^{-1}}$ .

Finally, the cost of pure exploration is also of scale  $\tilde{O}(T^{2/3})$ , which concludes the proof.

(2). Here we simply take  $\alpha^* = \min_{\alpha \in J} \alpha$ . We also use LinUCB as an example here since other UCB-based algorithms with exploration hyper-parameters could be identically bounded. Based on the definition of  $X_t$  and  $\tilde{X}_t$ , we have that,

$$\begin{aligned} X_t^\top \hat{\theta}_t + \alpha_{i_t} \|X_t\|_{V_t^{-1}} &= X_t^\top \hat{\theta}_t + (\alpha_{i_t} - \alpha^*) \|X_t\|_{V_t^{-1}} + \alpha^* \|X_t\|_{V_t^{-1}} \\ &\geq \tilde{X}_t^\top \hat{\theta}_t + (\alpha_{i_t} - \alpha^*) \|\tilde{X}_t\|_{V_t^{-1}} + \alpha^* \|\tilde{X}_t\|_{V_t^{-1}} \\ &\geq X_t^\top \hat{\theta}_t + (\alpha_{i_t} - \alpha^*) \|\tilde{X}_t\|_{V_t^{-1}} + \alpha^* \|X_t\|_{V_t^{-1}}, \end{aligned}$$

which implies that

$$(\alpha_{i_t} - \alpha^*) \|X_t\|_{V_t^{-1}} \geq (\alpha_{i_t} - \alpha^*) \|\tilde{X}_t\|_{V_t^{-1}}.$$

Since we have that  $\alpha_{i_t} \geq \alpha^*$ , and when  $\alpha_{i_t} > \alpha^*$  it holds that

$$\|X_t\|_{V_t^{-1}} \geq \|\tilde{X}_t\|_{V_t^{-1}}, \quad \forall t > 0. \quad (13)$$

On the other hand, when  $\alpha_{i_t} = \alpha^*$  it holds that  $X_t = \tilde{X}_t$ , which consequently implies that

$$\|X_t\|_{V_t^{-1}} = \|\tilde{X}_t\|_{V_t^{-1}}, \quad \forall t > 0.$$

According to the proof of LinUCB we could similarly argue that

$$\begin{aligned} x_{t,*}^\top \theta - \tilde{X}_t^\top \theta &\leq \alpha^* \left( \|\tilde{X}_t\|_{V_t^{-1}} - \|\tilde{x}_{t,*}\|_{V_t^{-1}} \right) + \|x_{t,*} - \tilde{X}_t\|_{V_t^{-1}} \|\hat{\theta}_t - \theta\|_{V_t} \\ &\leq 2\alpha^* \|\tilde{X}_t\|_{V_t^{-1}}, \end{aligned}$$

since  $\alpha(T) \leq \alpha^*$ . Therefore, we have

$$\sum_{t=T_1+1}^T \left( \mu(x_{t,*}^\top \theta) - \mu(\tilde{X}_t^\top \theta) \right) \leq 2\alpha^* \sum_{t=T_1+1}^T \|\tilde{X}_t\|_{V_t^{-1}} \leq 2\alpha^* \sum_{t=T_1+1}^T \|X_t\|_{V_t^{-1}} = \tilde{O}(\sqrt{T}).$$

**Remark 3.** (1) Intuitively, we can deduce Eqn. (13) by choosing  $\alpha^* = \min_{\alpha \in J} \alpha$ , i.e.  $\alpha^*$  is no larger than any exploration hyper-parameter candidate since the best feature vector solved in UCB algorithms tends to have larger value of  $\|\cdot\|_{V_t^{-1}}$  at time  $t$  if we enlarge  $\alpha$ . In other words, under larger  $\alpha$  we would more likely to choose arm with greater uncertainty quantified by the value of  $\|\cdot\|_{V_t^{-1}}$ . (2) On the other hand, for TS bandit algorithms we would expect the similar result: the

522 feature vectors of superior arms tend to have smaller value of  $\|\cdot\|_{V_t^{-1}}$  since the value of  $\|\cdot\|_{V_t^{-1}}$   
 523 depicts the standard deviation of the feature vector. And the direction of the optimal arm should be  
 524 frequently explored in the long run and hence its standard deviation is expected to be smaller than  
 525 other inferior arms. By enlarging  $\alpha$ , we would have more chance to choose those sub-optimal arm  
 526 with larger standard deviation and smaller estimated reward, which means results in Eqn. (13) could  
 527 happen with high probability.

528 And this concludes the proof.

529 (3). Here we would use LinUCB and LinTS for the detailed proof, and note that regret bound of all  
 530 other UCB and TS algorithms could be similarly deduced. W.l.o.g. we take  $\alpha^* = \min_{\alpha \in J} \alpha$

For LinUCB, since the Lemma 3 holds for any sequence  $(x_1, \dots, x_t)$ , and hence we have that with probability at least  $1 - \delta$ ,

$$\|\hat{\theta} - \theta\|_{V_t} \leq \beta_t(\delta) \leq \alpha(t, \delta).$$

And we would omit  $\delta$  for simplicity. Recall that for  $t > T_1$ , we denote the feature vector pulled at round  $t$  as  $X_t$ , i.e.

$$X_t = \operatorname{argmax}_{x \in \mathcal{A}_t} x^\top \hat{\theta}_t + \alpha_{i_t} \|x\|_{V_t^{-1}}, \quad X_t = X_t(\alpha_{i_t} | \mathcal{F}_{t-1}).$$

And we also define  $\tilde{X}_t = X_t(\alpha^* | \mathcal{F}_{t-1})$ , i.e.

$$\tilde{X}_t = \operatorname{argmax}_{x \in \mathcal{A}_t} x^\top \hat{\theta}_t + \alpha^* \|x\|_{V_t^{-1}}.$$

And it turns out that the Quantity (A) can be represented by

$$\mathbb{E} \left[ \sum_{t=T_1+1}^T (\mu(x_{t,*}^\top \theta) - \mu(X_t(\alpha^* | \mathcal{F}_{t-1})^\top \theta)) \right] = \mathbb{E} \left[ \sum_{t=T_1+1}^T (\mu(x_{t,*}^\top \theta) - \mu(\tilde{X}_t^\top \theta)) \right].$$

Note the selection of  $a_t$  in LinUCB implies that

$$x_{t,*}^\top \hat{\theta}_t + \alpha_{i_t} \|x_{t,*}\|_{V_t^{-1}} \leq X_t^\top \hat{\theta}_t + \alpha_{i_t} \|X_t\|_{V_t^{-1}}.$$

531 Therefore, we have

$$\begin{aligned} X_t^\top \hat{\theta}_t + \alpha_{i_t} \|X_t\|_{V_t^{-1}} &\geq x_{t,*}^\top \theta + \alpha_{i_t} \|x_{t,*}\|_{V_t^{-1}} + x_{t,*}^\top (\hat{\theta}_t - \theta) \\ &\geq x_{t,*}^\top \theta + \alpha_{i_t} \|x_{t,*}\|_{V_t^{-1}} - \|x_{t,*}\|_{V_t^{-1}} \|\hat{\theta}_t - \theta\|_{V_t} \\ &\geq x_{t,*}^\top \theta + (\alpha_{i_t} - \alpha(T)) \|x_{t,*}\|_{V_t^{-1}}. \end{aligned} \quad (14)$$

532 Therefore, it holds that,

$$\begin{aligned} X_t^\top \theta &\geq x_{t,*}^\top \theta + (\alpha_{i_t} - \alpha(T)) \|x_{t,*}\|_{V_t^{-1}} - \alpha_{i_t} \|X_t\|_{V_t^{-1}} + X_t^\top (\theta - \hat{\theta}_t), \\ (x_{t,*} - X_t)^\top \theta &\leq (\alpha(T) + \alpha_{i_t}) \|X_t\|_{V_t^{-1}} + (\alpha(T) - \alpha_{i_t}) \|x_{t,*}\|_{V_t^{-1}}, \end{aligned}$$

By Lemma 2, we have as long as  $T_1 = O(T^{4/7})$ , it holds that

$$(x_{t,*} - X_t)^\top \theta \leq 2\alpha(T)T^{-2/7}, \quad t > T_1.$$

Similarly, we could also deduce that

$$(x_{t,*} - \tilde{X}_t)^\top \theta \leq 2\alpha(T)T^{-2/7}, \quad t > T_1.$$

Firstly, we take  $\mathcal{A}_t = \{x : \|x\| \leq a^2\}$ ,  $a > 0$  for example, then it holds that  $x_{t,*} = \theta / \|\theta\|$ , and consequently

$$\|x_{t,*} - X_t\|, \|x_{t,*} - \tilde{X}_t\| \leq \sqrt{4a\alpha(T)T^{-2/7} / \|\theta\|} = O(\sqrt{\alpha(T)}T^{-1/7}).$$

533 Please refer to Figure 3 (a) for a 2D visual explanation, and similar argument could be made for  
 534 higher dimension cases. And this implies that

$$\|X_t - \tilde{X}_t\| = O(\sqrt{\alpha(T)}T^{-1/7}). \quad (15)$$

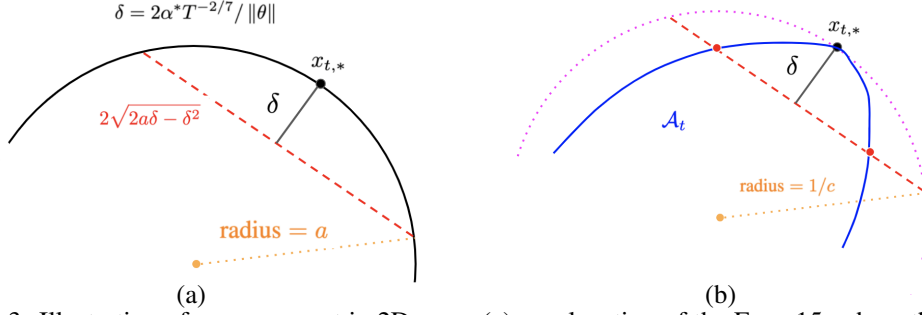

Figure 3: Illustration of our argument in 2D case: (a). explanation of the Eqn. 15, where the red line denotes the maximum distance between  $X_t$  and  $X_t^*$ ; (b). visualization on how to cover the neighborhood of  $x_{t,*}$  on  $\mathcal{A}_t$ , where the blue line denotes the boundary of  $\mathcal{A}_t$  and the pink dashed circle is the outer cover with radius  $1/c$ . In this case, the length of red line gives an upper bound of the maximum distance between  $X_t$  and  $X_t^*$ .

Generally, if  $\mathcal{A}_t$  is some convex set, and we know there exists a small neighborhood of the optimal feature vector  $x_{t,*} \in \mathcal{A}_t$  such that the (sectional) principal curvature in this neighborhood can be lower bounded by some positive constant  $c > 0$ . Then we can cover this neighborhood by a  $d$ -dimensional sphere with radius  $1/c$  (Figure 3 (b) for 2D visualization), and hence we could similarly deduce the above result. Note that for the example  $\mathcal{A}_t = \{x : \|x\| \leq a\}$ ,  $a > 0$ , all the principal curvatures are equal to  $1/a$  anywhere on this sphere, and hence it is a special case. The rest of argument is based on the proof outline of UCB bandits. According to the proof of LinUCB we could similarly argue that

$$\begin{aligned} x_{t,*}^\top \theta - \tilde{X}_t^\top \theta &\leq \alpha^* \left( \|\tilde{X}_t\|_{V_t^{-1}} - \|\tilde{x}_{t,*}\|_{V_t^{-1}} \right) + \|x_{t,*} - \tilde{X}_t\|_{V_t^{-1}} \|\hat{\theta}_t - \theta\|_{V_t} \\ &\leq (\alpha^* + \alpha(T)) \|\tilde{X}_t\|_{V_t^{-1}} + \alpha(T) \|x_{t,*}\|_{V_t^{-1}}. \end{aligned}$$

In conclusion, we have that

$$\sum_{t=T_1+1}^T \left( \mu(x_{t,*}^\top \theta) - \mu(\tilde{X}_t^\top \theta) \right) = \tilde{O} \left( \sum_{t=T_1+1}^T \|\tilde{X}_t\|_{V_t^{-1}} + \|x_{t,*}\|_{V_t^{-1}} \right). \quad (16)$$

Note that we have that,

$$\begin{aligned} \sum_{t=T_1+1}^T \|\tilde{X}_t\|_{V_t^{-1}} &\leq \sum_{t=T_1+1}^T \|X_t\|_{V_t^{-1}} + \sum_{t=T_1+1}^T \|X_t - \tilde{X}_t\|_{V_t^{-1}} \\ \sum_{t=T_1+1}^T \|x_{t,*}\|_{V_t^{-1}} &\leq \sum_{t=T_1+1}^T \|X_t\|_{V_t^{-1}} + \sum_{t=T_1+1}^T \|X_t - x_{t,*}\|_{V_t^{-1}}, \end{aligned}$$

where the first quantity could be easily bounded by Lemma 4, i.e.

$$\sum_{t=T_1+1}^T \|X_t\|_{V_t^{-1}} \leq \sqrt{2dT \log \left( 1 + \frac{T}{\lambda} \right)} = \tilde{O}(\sqrt{T}).$$

And the second quantity could be bounded as

$$\sum_{t=T_1+1}^T \|X_t - \tilde{X}_t\|_{V_t^{-1}} \leq \sum_{t=T_1+1}^T \|X_t - \tilde{X}_t\| \sqrt{\lambda_{\min}(V_t^{-1})} \lesssim \sum_{t=T_1+1}^T \sqrt{\alpha^*} T^{-3/7} = \tilde{O}(T^{4/7}),$$

with high probability. Then by taking  $\delta = \delta/T^{3/7}$  we can easily prove that

$$\mathbb{E} \left[ \sum_{t=T_1+1}^T \|X_t - \tilde{X}_t\|_{V_t^{-1}} \right] = \tilde{O}(T^{4/7}).$$

Similarly, it holds that

$$\mathbb{E} \left[ \sum_{t=T_1+1}^T \|X_t - x_{t,*}\|_{V_t^{-1}} \right] = \tilde{O}(T^{4/7}).$$

Therefore, we have that

$$\sum_{t=T_1+1}^T \left( \mu(x_{t,*}^T \theta) - \mu(\tilde{X}_t^T \theta) \right) = \tilde{O}(T^{4/7}).$$

For LinTS, the proof could also be similarly deduced. And we modify the definition of  $\tilde{X}_t$  as

$$\tilde{X}_t = \operatorname{argmax}_{x \in \mathcal{A}_t} x^\top \hat{\theta}_t + \alpha^* \|x\|_{V_t^{-1}} \tilde{Z}_t,$$

545 where  $Z_t$  is a standard normal random variable. And we could similarly show that:

$$\begin{aligned} X_t^\top \hat{\theta}_t + \alpha_{i_t} \|X_t\|_{V_t^{-1}} Z_t &\geq x_{t,*}^\top \theta + \alpha_{i_t} \|x_{t,*}\|_{V_t^{-1}} Z_{t,*} + x_{t,*}^\top (\hat{\theta}_t - \theta) \\ &\geq x_{t,*}^\top \theta + \alpha_{i_t} \|x_{t,*}\|_{V_t^{-1}} Z_{t,*} + \|x_{t,*}\|_{V_t^{-1}} \|\hat{\theta}_t - \theta\|_{V_t} \\ &\geq x_{t,*}^\top \theta + (\alpha_{i_t} Z_{t,*} - \alpha(T)) \|x_{t,*}\|_{V_t^{-1}}. \end{aligned}$$

546 Therefore, it holds that,

$$\begin{aligned} X_t^\top \theta &\geq x_{t,*}^\top \theta + (\alpha_{i_t} Z_{t,*} - \alpha(T)) \|x_{t,*}\|_{V_t^{-1}} - \alpha_{i_t} \|X_t\|_{V_t^{-1}} Z_t + X_t^\top (\theta - \hat{\theta}_t), \\ (x_{t,*} - X_t)^\top \theta &\leq (\alpha(T) + \alpha_{i_t} Z_t) \|X_t\|_{V_t^{-1}} + (\alpha(T) - \alpha_{i_t} Z_{t,*}) \|x_{t,*}\|_{V_t^{-1}} = K_t, \end{aligned} \quad (17)$$

where  $K_t$  is normal random variable with

$$\mathbb{E}(K_t) \leq 2\alpha(T)T^{-2/7}, \quad \text{SD}(K_t) \leq \sqrt{2}\alpha_{i_t}T^{-2/7} \leq \sqrt{2}\alpha^*T^{-2/7}.$$

547 According to Lemma 5, we have that for arbitrary  $\xi > 0$

$$\begin{aligned} &P \left( \max_{t \in T} K_t \geq 2\alpha(T)T^{-2/7} + \left( \sqrt{2\log(T)} + \xi \right) \sqrt{2}\alpha^*T^{-2/7} \right) \\ &\leq P \left( \max_{t \in T} \frac{K_t - \mathbb{E}[K_t]}{\text{SD}(K_t)} \geq \sqrt{2\log(T)} + \xi \right) \\ &= T \times P \left( Z \geq \sqrt{2\log(T)} + \xi \right) \quad Z \sim N(0, 1) \\ &\leq T \frac{1}{\sqrt{\pi}(\sqrt{2\log(T)} + \xi)} \exp \left( -(\sqrt{2\log(T)} + \xi)^2/2 \right) \\ &\leq \frac{1}{\sqrt{2\log(T)} + \xi} \exp \left( -\frac{\xi^2}{2} \right). \end{aligned}$$

By taking  $\xi = 2\sqrt{\log(T)}$ , it holds that

$$P \left( \max_{t \in T} K_t \geq 2\alpha(T)T^{-2/7} + \left( \sqrt{2\log(T)} + \xi \right) \sqrt{2}\alpha^*T^{-2/7} \right) \leq \frac{1}{2T^2\sqrt{\log(T)}}.$$

Since this probability upper bound is ultra small and hence negligible, we have

$$(x_{t,*} - X_t)^\top \theta \leq 2\alpha(T)T^{-2/7}, \quad t > T_1.$$

Similarly, we could also deduce that

$$(x_{t,*} - \tilde{X}_t)^\top \theta \leq 2\alpha(T)T^{-2/7}, \quad t > T_1.$$

This result similarly implies that

$$\mathbb{E} \left[ \sum_{t=T_1+1}^T \|X_t - x_{t,*}\|_{V_t^{-1}} \right] = \tilde{O}(T^{4/7}), \quad \mathbb{E} \left[ \sum_{t=T_1+1}^T \|X_t - \tilde{X}_t\|_{V_t^{-1}} \right] = \tilde{O}(T^{4/7}).$$



According to [5] (or Eqn. (17)), we know that for LinTS we have the similar result as in Eqn. (16):

$$\sum_{t=T_1+1}^T \left( \mu(x_{t,*}^T \theta) - \mu(\tilde{X}_t^T \theta) \right) = \tilde{O} \left( \sum_{t=T_1+1}^T \left\| \tilde{X}_t \right\|_{V_t^{-1}} \|x_{t,*}\|_{V_t^{-1}} \right).$$

And this directly implies that

$$\sum_{t=T_1+1}^T \left( \mu(x_{t,*}^T \theta) - \mu(\tilde{X}_t^T \theta) \right) = \tilde{O}(T^{4/7}).$$

548 Note we could use this procedure to bound the regret for UCB and TS bandit algorithms under  
 549 condition in (3), since most of the proofs for generalized linear bandits are closely related to the  
 550 rate of  $\sum_{t=T_1+1}^T \left\| \tilde{X}_t \right\|_{V_t^{-1}}$ . Finally, the cost of pure exploration is also of scale  $\tilde{O}(T^{4/7})$ , which  
 551 concludes the proof.

552

□

### 553 A.3 Analysis of Theorem 2

#### 554 A.3.1 Useful Conclusions

555 **Proposition 1.** Assume given the past information  $\mathcal{F}_{t-1}$  and the hyper-parameters to be used by  
 556 the contextual bandit algorithm at round  $t$ , the arm to be pulled by the contextual bandit algorithm  
 557 follows a fixed distribution. Denote  $R(\alpha^{(1)}, \dots, \alpha^{(L)}, T, \{\mathcal{F}_{t-1}\})$  as the cumulative regret of the  
 558 contextual bandit algorithm if it is run with parameters  $(\alpha^{(1)}, \dots, \alpha^{(L)})$  given the past information  
 559  $\mathcal{F}_{t-1}$  at round  $t$ . Then the auto tuning method in Algorithm 2 has regret that satisfies the following:

$$\begin{aligned} \mathbb{E}[R(T)] &\leq \min_{(\alpha^{(1)}, \dots, \alpha^{(L)}) \in J_1 \times \dots \times J_L} \mathbb{E}[R(\alpha^{(1)}, \dots, \alpha^{(L)}, T, \{\mathcal{F}_{t-1}\})] \\ &\quad + 2 \sum_{l=1}^L \sqrt{(e-1)n_l(T-T_1) \log n_l}. \end{aligned}$$

560 *Proof.* We also reload some notations here for simplicity in the same way as proof of Lemma 1 in  
 561 Appendix A.1. More specifically, since at iteration  $t$  we are given the past information  $\mathcal{F}_{t-1}$  to make  
 562 decision according to different choices of hyper-parameter values, and hence we would omit this  
 563 notation  $\mathcal{F}_{t-1}$  when we refer to the arm or feature vector we pull under different hyper-parameter  
 564 values: Denote  $a_t(\alpha_{i_1}^{(1)}, \dots, \alpha_{i_L}^{(L)})$  as the pulled arm at round  $t$  if the hyper-parameters selected  
 565 at round  $t$  is  $(\alpha_{i_1}^{(1)}, \dots, \alpha_{i_L}^{(L)})$ . Denote  $X_t(\alpha_{i_1}^{(1)}, \dots, \alpha_{i_L}^{(L)})$  as the corresponding feature vector  
 566 and  $\mu_t(\alpha_{i_1}^{(1)}, \dots, \alpha_{i_L}^{(L)})$  as the corresponding expected reward. It suffices to show that for any  
 567  $l = 1, \dots, L$ , the following holds.

$$\begin{aligned} &\sum_{t=1}^T \mathbb{E} \left[ \mu_t \left( \alpha_{i_t(1)}^{(1)}, \dots, \alpha_{i_t(l-1)}^{(l-1)}, \alpha_*^{(l)}, \dots, \alpha_*^{(L)} \right) \right] \\ &\quad - \sum_{t=1}^T \mathbb{E} \left[ \mu_t \left( \alpha_{i_t(1)}^{(1)}, \dots, \alpha_{i_t(l-1)}^{(l-1)}, \alpha_{i_t(l)}^{(l)}, \alpha_*^{(l+1)}, \dots, \alpha_*^{(L)} \right) \right] \\ &\leq 2\sqrt{(e-1)n_l T \log n_l}. \end{aligned} \tag{18}$$

568 For convenience, we will denote  $(\alpha_{i_t(1)}^{(1)}, \dots, \alpha_{i_t(l-1)}^{(l-1)}, \alpha_j^{(l)}, \alpha_*^{(l+1)}, \dots, \alpha_*^{(L)})$  as  $(\alpha_j)$  when there  
 569 is no ambiguity, which means that the first  $l-1$  hyper-parameters are chosen as  $\alpha_{i_t(s)}^{(s)}$  for  $s =$   
 570  $1, \dots, l-1$ , the  $l$ -th hyper-parameter is chosen with index  $j$  and the rest of the hyper-parameters are  
 571 chosen as  $\alpha_*^{(s)}$  for  $s = l+1, \dots, L$ . Then the result we want to show in Equation 18 can be written

572 as

$$\sum_{t=1}^T \mathbb{E} \left[ \mu_t \left( \alpha_{i_t(1)}^{(1)}, \dots, \alpha_{i_t(l-1)}^{(l-1)}, \alpha_*^{(l)}, \dots, \alpha_*^{(L)} \right) \right] - \sum_{t=1}^T \mathbb{E} [\mu_t(\alpha_{i_t(l)})] \leq 2\sqrt{(e-1)n_l T \log n_l}. \quad (19)$$

573 We will also omit the superscript  $l$  / subscript  $(l)$  for convenience when there is no ambiguity, so  $p_j^{(l)}(t), w_j^{(l)}(t), \hat{y}_t^{(l)}(j)$  are abbreviated as  $p_j(t), w_j(t), \hat{y}_t(j)$  respectively. Denote  $\mathcal{H}_t =$   
574  $\sigma \left( \alpha_{i_t(1)}^{(1)}, \dots, \alpha_{i_t(l-1)}^{(l-1)}, \alpha_*^{(l+1)}, \dots, \alpha_*^{(L)} \right)$  as the  $\sigma$ -algebra induced by the event that at round  $t$ , the  
575 first  $l-1$  hyper-parameters are chosen as  $\alpha_{i_t(s)}^{(s)}$  and for  $s = l+1, \dots, L$ , the hyper-parameters are  
576 chosen as  $\alpha_*^{(s)}$ . Given  $\sigma(\mathcal{F}_{t-1}, \mathcal{H}_t)$ , denote  $y_t(\alpha_j) = \mu_t(\alpha_j) + \epsilon'$  as the observed reward at round  $t$   
577 if  $\alpha^{(l)}$  is chosen as  $\alpha_j^{(l)}$  and the rest hyper-parameters given by  $\mathcal{H}_t$ . Here,  $\epsilon'$  is a hypothetical random  
578 noise if arm  $a_t(\alpha_j)$  is pulled at round  $t$ .

580 Given  $\sigma(\mathcal{F}_{t-1}, \mathcal{H}_t)$ , by the above definitions and Algorithm 2,  $\hat{y}_t(j) = y_t(\alpha_j)/p_j(t)$  if  $j = i_t(l)$ .  
581 Otherwise,  $\hat{y}_t(j) = 0$ . Since  $p_j(t) \geq \frac{\beta_l}{n_l}$ , we have  $\hat{y}_t(j) \leq \frac{n_l}{\beta_l}$  for all  $j \in [n_l]$  and  $t$ . We also have the  
582 following two inequalities.

$$\begin{aligned} \mathbb{E} \left( \sum_{i=1}^{n_l} p_i(t) \hat{y}_t(i) | \sigma(\mathcal{F}_{t-1}, \mathcal{H}_t) \right) &= \mathbb{E} (p_{i_t(l)}(t) \hat{y}_t(i_t(l)) | \sigma(\mathcal{F}_{t-1}, \mathcal{H}_t)) \\ &= \mathbb{E} (y_t(\alpha_{i_t(l)}) | \sigma(\mathcal{F}_{t-1}, \mathcal{H}_t)) = \mathbb{E} [\mu_t(\alpha_{i_t(l)}) | \sigma(\mathcal{F}_{t-1}, \mathcal{H}_t)] \end{aligned} \quad (20)$$

$$\begin{aligned} \mathbb{E} \left( \sum_{i=1}^{n_l} p_i(t) \hat{y}_t(i)^2 | \sigma(\mathcal{F}_{t-1}, \mathcal{H}_t) \right) &= \mathbb{E} (p_{i_t(l)}(t) \hat{y}_t(i_t(l))^2 | \sigma(\mathcal{F}_{t-1}, \mathcal{H}_t)) \\ &= \mathbb{E} (y_t(i_t(l)) \hat{y}_t(i_t(l)) | \sigma(\mathcal{F}_{t-1}, \mathcal{H}_t)) \leq \mathbb{E} (\hat{y}_t(i_t(l)) | \sigma(\mathcal{F}_{t-1}, \mathcal{H}_t)) \\ &= \mathbb{E} \left( \sum_{i=1}^{n_l} \hat{y}_t(i) | \sigma(\mathcal{F}_{t-1}, \mathcal{H}_t) \right) \end{aligned} \quad (21)$$

583 For a single  $i \in [n_l]$ , since given  $\mathcal{F}_{t-1}, p_i^{(l)}(t)$  is already fixed, which means that the choices of other  
584 hyper-parameters do not affect the distribution of  $i_t(l)$ . Moreover,  $a_t(\alpha_i)$  follows a fixed distribution  
585 due to the conditions in Theorem 2, i.e., the arm to be pulled follows a fixed distribution given the past  
586 information and the hyper-parameters to be used at round  $t$ . Therefore, given  $\sigma(\mathcal{F}_{t-1}, \mathcal{H}_t, a_t(\alpha_i), \epsilon')$ ,  
587  $i = i_t(l)$  is still with probability  $p_i^{(l)}(t)$  for all  $i \in [n_l]$ . So

$$\begin{aligned} \mathbb{E} (\hat{y}_t(i) | \sigma(\mathcal{F}_{t-1}, \mathcal{H}_t)) &= \mathbb{E} [\mathbb{E} (\hat{y}_t(i) | \sigma(\mathcal{F}_{t-1}, \mathcal{H}_t, a_t(\alpha_i), \epsilon')) | \sigma(\mathcal{F}_{t-1}, \mathcal{H}_t)] \\ &= \mathbb{E} [y_t(\alpha_i) | \sigma(\mathcal{F}_{t-1}, \mathcal{H}_t)] \\ &= \mathbb{E} [\mu_t(\alpha_i) | \sigma(\mathcal{F}_{t-1}, \mathcal{H}_t)]. \end{aligned} \quad (22)$$

588 From Equation 21 and 22, we have

$$\mathbb{E} \left( \sum_{i=1}^{n_l} p_i(t) \hat{y}_t(i)^2 | \sigma(\mathcal{F}_{t-1}, \mathcal{H}_t) \right) \leq \mathbb{E} \left( \sum_{i=1}^{n_l} \mu_t(\alpha_i) | \sigma(\mathcal{F}_{t-1}, \mathcal{H}_t) \right) \quad (23)$$

589 We still look at the lower bound and upper bound of  $\mathbb{E}[\log \frac{W_{T+1}}{W_1}]$ , but now  $W_t = \sum_{i=1}^{n_l} w_i^{(l)}(t)$ , and  
590 we will use the abbreviation  $w_i(t) = w_i^{(l)}(t)$  below for ease of notation.

591 **Lower bound:**

$$\begin{aligned} \mathbb{E} \left[ \log \frac{w_i(t+1)}{w_i(t)} | \sigma(\mathcal{F}_{t-1}, \mathcal{H}_t) \right] &= \mathbb{E} \left[ \frac{\beta_l}{n_l} \hat{y}_t(i) | \sigma(\mathcal{F}_{t-1}, \mathcal{H}_t) \right] \\ &= \mathbb{E} \left[ \frac{\beta_l}{n_l} \mu_t(\alpha_i) | \sigma(\mathcal{F}_{t-1}, \mathcal{H}_t) \right] \quad \text{from Equation 22} \end{aligned}$$

592 Take an expectation on both sides and sum over  $t$ , we have

$$\mathbb{E}[\log w_i(T+1)] = \frac{\beta_l}{n_l} \sum_{t=1}^T \mathbb{E}[\mu_t(\alpha_i)]$$

593 Therefore, for all  $i \in [n_l]$ ,

$$\mathbb{E}[\log \frac{W_{T+1}}{W_1}] \geq \mathbb{E}[\log w_i(T+1)] - \log n_l = \frac{\beta_l}{n_l} \sum_{t=1}^T \mathbb{E}[\mu_t(\alpha_i)] - \log n_l. \quad (24)$$

594 **Upper bound:** This part is almost the same as the arguments in Lemma 1, except now that the  
 595 conditional expectation is taken over  $\sigma(\mathcal{F}_{t-1}, \mathcal{H}_t)$ . For completeness, we write out the proof of this  
 596 part below. Again, we will use  $p_i(t) = p_i^{(l)}(t)$  and  $w_i(t) = w_i^{(l)}(t)$  for convenience.

$$\begin{aligned} \mathbb{E} \left[ \log \frac{W_{t+1}}{W_t} \middle| \sigma(\mathcal{F}_{t-1}, \mathcal{H}_t) \right] &= \mathbb{E} \left[ \log \sum_{i=1}^{n_l} \frac{w_i(t+1)}{W_t} \middle| \sigma(\mathcal{F}_{t-1}, \mathcal{H}_t) \right] \\ &= \mathbb{E} \left[ \log \sum_{i=1}^{n_l} \frac{w_i(t)}{W_t} \exp \left( \frac{\beta_l}{n_l} \hat{y}_t(i) \right) \middle| \sigma(\mathcal{F}_{t-1}, \mathcal{H}_t) \right] \\ &= \mathbb{E} \left[ \log \sum_{i=1}^{n_l} \frac{p_i(t) - \frac{\beta_l}{n_l}}{1 - \beta_l} \exp \left( \frac{\beta_l}{n_l} \hat{y}_t(i) \right) \middle| \sigma(\mathcal{F}_{t-1}, \mathcal{H}_t) \right] \quad \text{definition of } p_i(t) \\ &\leq \mathbb{E} \left[ \log \sum_{i=1}^{n_l} \frac{p_i(t) - \frac{\beta_l}{n_l}}{1 - \beta_l} \left( 1 + \frac{\beta_l}{n_l} \hat{y}_t(i) + \frac{(e-2)\beta_l^2}{n_l^2} \hat{y}_t(i)^2 \right) \middle| \sigma(\mathcal{F}_{t-1}, \mathcal{H}_t) \right] \\ &\leq \mathbb{E} \left[ \log \left( 1 + \sum_{i=1}^{n_l} \left[ \frac{\beta_l}{n_l(1-\beta_l)} p_i(t) \hat{y}_t(i) + \frac{(e-2)\beta_l^2}{n_l^2(1-\beta_l)} p_i(t) \hat{y}_t(i)^2 \right] \right) \middle| \sigma(\mathcal{F}_{t-1}, \mathcal{H}_t) \right] \\ &\leq \mathbb{E} \left[ \sum_{i=1}^{n_l} \left( \frac{\beta_l}{n_l(1-\beta_l)} p_i(t) \hat{y}_t(i) + \frac{(e-2)\beta_l^2}{n_l^2(1-\beta_l)} p_i(t) \hat{y}_t(i)^2 \middle| \sigma(\mathcal{F}_{t-1}, \mathcal{H}_t) \right) \right] \\ &\leq \frac{\beta_l}{n_l(1-\beta_l)} \mathbb{E}[\mu_t(\alpha_i) | \sigma(\mathcal{F}_{t-1}, \mathcal{H}_t)] + \frac{(e-2)\beta_l^2}{n_l^2(1-\beta_l)} \sum_{i=1}^{n_l} \mathbb{E}[\mu_t(\alpha_i) | \sigma(\mathcal{F}_{t-1}, \mathcal{H}_t)]. \end{aligned}$$

597 The first inequality “ $\leq$ ” in the above holds since  $e^x \leq 1 + x + (e-2)x^2$  for  $x \in [0, 1]$ . Here, we  
 598 have  $0 \leq \frac{\beta_l}{n_l} \hat{y}_t(i) \leq 1$  because  $p_i(t) \geq \frac{\beta_l}{n_l}$ ,  $0 \leq y_t(\alpha_i) \leq 1$  and  $\hat{y}_t(i) \leq \frac{y_t(\alpha_i)}{p_i(t)}$ . The last inequality is  
 599 from Equation 20, 23. Take another expectation on both sides, we get

$$\mathbb{E} \left[ \log \frac{W_{t+1}}{W_t} \right] \leq \frac{\beta_l}{n_l(1-\beta_l)} \mathbb{E}[\mu_t(\alpha_i)] + \frac{(e-2)\beta_l^2}{n_l^2(1-\beta_l)} \sum_{i=1}^{n_l} \mathbb{E}[\mu_t(\alpha_i)]$$

600 By summing the above over  $t$ , we have

$$\mathbb{E}[\log \frac{W_{T+1}}{W_1}] \leq \frac{\beta_l}{n_l(1-\beta_l)} \sum_{t=1}^T \mathbb{E}[\mu_t(\alpha_{i_t(l)})] + \frac{(e-2)\beta_l^2}{n_l^2(1-\beta_l)} \sum_{i=1}^{n_l} \sum_{t=1}^T \mathbb{E}[\mu_t(\alpha_i)] \quad (25)$$

601 Note that the lower bound in Equation 24 holds for any  $i$ , so it also holds for  $\alpha_*^{(l)}$ . Denote

$$G_{\max} = \sum_{t=1}^T \mathbb{E} \left[ \mu_t(\alpha_{i_t(1)}^{(1)}, \dots, \alpha_{i_t(l-1)}^{(l-1)}, \alpha_*^{(l)}, \dots, \alpha_*^{(L)}) \right].$$

602 Then

$$\frac{\beta_l}{n_l} G_{\max} - \log n_l \leq \frac{\beta_l}{n_l(1-\beta_l)} \sum_{t=1}^T \mathbb{E}[\mu_t(\alpha_{i_t(l)})] + \frac{(e-2)\beta_l^2}{n_l^2(1-\beta_l)} \sum_{i=1}^{n_l} \sum_{t=1}^T \mathbb{E}[\mu_t(\alpha_i)]$$

603 We note that  $\sum_{t=1}^T \mathbb{E}[\mu_t(\alpha_i)] \leq T$  for all  $i$ , so

$$\frac{\beta_l}{n_l} G_{\max} - \log n_l \leq \frac{\beta_l}{n_l(1-\beta_l)} \sum_{t=1}^T \mathbb{E}[\mu_t(\alpha_{i_t(l)})] + \frac{(e-2)\beta_l^2}{n_l(1-\beta_l)} T$$

604 Simplify the above inequality and due to the choice of  $\beta_l$ , we have

$$\begin{aligned} G_{\max} - \sum_{t=1}^T \mathbb{E}[\mu_t(\alpha_{i_t(l)})] &\leq \beta_l G_{\max} + (e-2)\beta_l T + \frac{(1-\beta_l)n_l}{\beta_l} \log n_l \\ &\leq 2\sqrt{(e-1)n_l T \log n_l}. \end{aligned}$$

605 This concludes the proof of Proposition 1.  $\square$

606 **Lemma 6** (Adapted from Lemma 3). *For any  $\delta < 1$ , under our problem setting in Section 3 with the*  
 607 *regularization hyper-parameter  $\lambda \in [\lambda_{\min}, \lambda_{\max}]$  ( $\lambda_{\min} > 0$ ), it holds that for all  $t > 0$ ,*

$$\begin{aligned} \|\hat{\theta}_t - \theta^*\|_{V_t} &\leq \beta_t(\delta), \\ \forall x \in \mathbb{R}^d, |x^\top (\hat{\theta}_t - \theta^*)| &\leq \|x\|_{V_t^{-1}} \beta_t(\delta), \end{aligned}$$

with probability at least  $1 - \delta$ , where

$$\beta_t(\delta) = \sigma \sqrt{\log \left( \frac{(\lambda_{\min} + t)^d}{\delta^2 \lambda_{\min}^d} \right)} + \sqrt{\lambda_{\max}} S.$$

608 *Proof.* The proof of this Lemma is trivial given Lemma 3. For any  $\lambda \in [\lambda_{\min}, \lambda_{\max}]$ , according to  
 609 Lemma 3 it holds that, for all  $t > 0$ ,

$$\begin{aligned} \|\hat{\theta}_t - \theta^*\|_{V_t} &\leq \beta_t(\delta), \\ \forall x \in \mathbb{R}^d, |x^\top (\hat{\theta}_t - \theta^*)| &\leq \|x\|_{V_t^{-1}} \beta_t(\delta), \end{aligned}$$

with probability at least  $1 - \delta$ , where

$$\beta_t(\delta) = \sigma \sqrt{\log \left( \frac{(\lambda + t)^d}{\delta^2 \lambda^d} \right)} + \sqrt{\lambda} S \leq \sigma \sqrt{\log \left( \frac{(\lambda_{\min} + t)^d}{\delta^2 \lambda_{\min}^d} \right)} + \sqrt{\lambda_{\max}} S.$$

610  $\square$

### 611 A.3.2 Proof of Theorem 2

612 *Proof.* We could validate Theorem 2 by extending the proof of Theorem 1 with Proposition 1. Note  
 613 that most contextual bandit algorithms contain three types of hyper-parameters: one is the exploration  
 614 rate, which we have throughout discussed in the proof of Theorem 1. The second class is the stepsize  
 615 of some gradient-based optimization loop (e.g. Laplace-TS [4]), but the output from the loop when  
 616 the convergent criteria is met is similar. In other words, this kind of hyper-parameter is not critical in  
 617 the theoretical proof. The last one is the regularization parameter  $\lambda$ , but it can be easily handled by  
 618 using Lemma 6. Therefore, we only need to consider the case when we tune the exploration rate and  
 619 the regularization parameter simultaneously. We will take LinUCB with two hyperparameters (i.e.  
 620 exploration rate and regularization parameter) as an example:

The proof is similar to the one in Appendix A.2. Denote the candidate sets for hyper-parameter  $\alpha$  and  $\lambda$  as  $J_1$  and  $J_2$  ( $0 < \lambda_{\min} \leq J_2 \leq \lambda_{\max}$ ). And denote  $V_t(\lambda) = \lambda I + \sum_{i=1}^{t-1} X_i X_i^\top$ ,  $\alpha_{i_t}$  and  $\lambda_{i_t}$  as the exploration and regularization rate we tune in our Syndicated framework at round  $t$ . Moreover, we define  $\alpha^* = \min_{\alpha \in J_1} \alpha$ ,  $\lambda^* = \min_{\lambda \in J_2} \lambda$ . With probability at least  $1 - \delta$ ,

$$\|\hat{\theta} - \theta\|_{V_t(\lambda)} \leq \beta_t(\delta) := \alpha(T, \delta), \quad \forall \lambda \in J_2$$

where the definition of  $\beta_t(\delta)$  is reloaded in Lemma 6. And we would omit  $\delta$  for simplicity. For  $t > T_1$ , we denote the feature vector pulled at round  $t$  as  $X_t$ , i.e.

$$X_t = \operatorname{argmax}_{x \in \mathcal{A}_t} x^\top \hat{\theta}_t + \alpha_{i_t} \|x\|_{V_t^{-1}(\lambda_{i_t})}, \quad X_t = X_t(\alpha_{i_t}, \lambda_{i_t} | \mathcal{F}_{t-1}).$$

And we also define  $\tilde{X}_t = X_t(\alpha^*, \lambda^* | \mathcal{F}_{t-1})$ , i.e.

$$\tilde{X}_t = \operatorname{argmax}_{x \in \mathcal{A}_t} x^\top \hat{\theta}_t + \alpha^* \|x\|_{V_t^{-1}(\lambda^*)}.$$

621 According to Proposition 1, it holds that

$$\begin{aligned} \mathbb{E}[R(T)] &\leq \mathbb{E}[R(\alpha^*, \lambda^*, T, \{\mathcal{F}_{t-1}\})] + O(\sqrt{T - T_1}) \\ &\leq \mathbb{E} \left[ \sum_{t=T_1+1}^T \left( \mu(x_{t,*}^\top \theta) - \mu(\tilde{X}_t^\top \theta) \right) \right] + O(\sqrt{T - T_1}) \end{aligned}$$

622 According to the proof of LinUCB we could similarly argue that

$$\begin{aligned} x_{t,*}^\top \theta - \tilde{X}_t^\top \theta &\leq \alpha^* \left( \|\tilde{X}_t\|_{V_t^{-1}(\lambda^*)} - \|\tilde{x}_{t,*}\|_{V_t^{-1}(\lambda^*)} \right) + \|x_{t,*} - \tilde{X}_t\|_{V_t^{-1}(\lambda^*)} \|\hat{\theta}_t - \theta\|_{V_t(\lambda^*)} \\ &\leq (\alpha^* + \alpha(T)) \|\tilde{X}_t\|_{V_t^{-1}(\lambda^*)} + \alpha(T) \|x_{t,*}\|_{V_t^{-1}(\lambda^*)}. \end{aligned}$$

In conclusion, we have that

$$\sum_{t=T_1+1}^T \left( \mu(x_{t,*}^\top \theta) - \mu(\tilde{X}_t^\top \theta) \right) = \tilde{O} \left( \sum_{t=T_1+1}^T \|\tilde{X}_t\|_{V_t^{-1}(\lambda^*)} + \sum_{t=T_1+1}^T \|x_{t,*}\|_{V_t^{-1}(\lambda^*)} \right).$$

By Lemma 4 and choosing  $T_1 = T^{2/3}$ , it holds that,

$$\sum_{t=T_1+1}^T \|x_{t,*}\|_{V_t^{-1}} + \sum_{t=T_1+1}^T \|\tilde{X}_t\|_{V_t^{-1}} = O(T \times T^{-1/3}) = O(T^{2/3}).$$

623 Note we could literally use the identical argument for all UCB and TS bandit algorithms as in the  
624 proof of Theorem 1, and the only modification is the value of  $\alpha(T)$  we newly defined in Lemma 6.

625 To prove the Theorem 1 (3) holds, we can also use an exactly identical argument as in the proof of  
626 Theorem 1 (3) in Appendix A.2, and the only difference is we replace the value of  $\alpha(T)$  in our main  
627 paper by the newly defined one in Lemma 6, and hence we would not copy it here again. And this  
628 fact concludes our proof.  $\square$

#### 629 A.4 Experimental Settings

630 **Simulations.** We use  $d = 10$ ,  $K = 100$  and draw  $\theta^* \sim \text{Uniform}(-\frac{1}{\sqrt{d}}, \frac{1}{\sqrt{d}})$ . For linear bandits,  
631 we draw the feature vectors  $x_{t,a} \sim \text{Uniform}(-\frac{1}{\sqrt{d}}, \frac{1}{\sqrt{d}})$  and transform the mean reward of arm  $a$  at  
632 round  $t$  by  $\mu_{t,a} \leftarrow \frac{\mu_{t,a} + 1}{2}$  to make sure the mean rewards are within  $[0, 1]$ . Each round an arm is  
633 pulled, a sample reward  $Y_t \sim N(\mu_{t,a_t}, 0.1)$  is revealed to the player. For logistic models, the feature  
634 vectors  $x_{t,a} \sim \text{Uniform}(-1, 1)$  and the corresponding mean reward is  $\mu_{t,a} = 1/(1 + \exp(-x_{t,a}^\top \theta^*))$ .  
635 A sample Bernoulli reward is drawn when an arm is pulled.

636 **Real datasets.** We use the benchmark MovieLens 100K dataset similarly as in [8]. The MovieLens  
637 dataset contains 100K ratings on 1,682 movies contributed by 943 users. For data preprocessing, we  
638 apply LIBPMF [26, 27] to factorize the ratings matrix to get feature matrices for both users and movies  
639 with  $d = 20$ . We randomly select  $K = 1000$  movies (arms) in each round, and the model parameter  
640  $\theta^*$  is defined as the averaged feature vectors of 100 randomly selected users. For linear models, the  
641 mean reward is defined as  $\mu_{t,a} = x_{t,a}^\top \theta$  and transformed into  $[0, 1]$ . The sample reward is drawn from  
642  $N(\mu_{t,a}, 1)$ . For logistic models, the mean reward is defined as  $\mu_{t,a} = 1/(1 + \exp(-x_{t,a}^\top \theta^*))$ , and  
643 the sample reward is drawn from a Bernoulli distribution.

## 644 A.5 Additional experiments on tuning SGD-TS

645 In this section, we show the comparison of different tuning methods in SGD-TS [14], a recently  
 646 proposed efficient algorithm for generalized linear bandit. We apply SGD-TS with a logistic model  
 647 to the datasets considered in Section 6. SGD-TS has four tuning parameters, the length of epoch  
 648  $\tau$ , two exploration parameters  $\alpha^{(1)}$  and  $\alpha^{(2)}$ , step size for stochastic gradient descent  $\eta_0$ . In [14],  
 649 the experiments are conducted by using a grid search of all four parameters, which is not feasible  
 650 in practice. Since the epoch length has to be pre-determined, it is not applicable to tune it online.  
 651 We set  $\tau = 10 \times \lfloor \max(\log T, d) \rfloor$  as suggested by the grid search set in [14] and fix it for all tuning  
 652 methods. The tuning set for  $\alpha^{(1)}$  and  $\alpha^{(2)}$  are the same  $\{0, 0.01, 0.1, 1, 10\}$ . The tuning set for step  
 653 size  $\eta_0$  is set as  $\{0.01, 0.1, 1, 10\}$ . The theoretical choices of step size  $\eta_0$  in SGD-TS are intractable,  
 654 so for the tuning methods in Section 6, we make the following modifications:

- 655 1. **OP [9]**: We modify OPLINUCB to tune step size  $\eta_0$  only.
- 656 2. **Corral [3]**: We modify the CORRAL model selection framework to tune step size  $\eta_0$  only.
- 657 3. **Corral-Combined [3]**: We modify the CORRAL model selection framework to tune  
 658 all three hyper-parameters  $\alpha^{(1)}$ ,  $\alpha^{(2)}$  and  $\eta_0$ . And the tuning set contain all possible  
 659 combinations of these three hyper-parameters.
- 660 4. **TL (Our work, Algorithm 1)**: This is our proposed Algorithm 1, where we use the  
 661 two-layer bandit structure to tune the step size  $\eta_0$  only.
- 662 5. **TL-Combined (Our work, Algorithm 1)**: This method tunes all three hyper-parameters  
 663  $\alpha^{(1)}$ ,  $\alpha^{(2)}$  and  $\eta_0$  using Algorithm 1, but with the tuning set containing all the possible  
 664 combinations of the three hyper-parameters.
- 665 6. **Syndicated (Our work, Algorithm 2)**: This method keeps three separate tuning sets for  
 666  $\alpha^{(1)}$ ,  $\alpha^{(2)}$  and  $\eta_0$  respectively. It uses the Syndicated Bandits framework in Algorithm 2.

667 For OP Corral and TL, since they do not tune the two exploration parameters,  $\alpha^{(1)}$  and  $\alpha^{(2)}$  are  
 668 set as the theoretical values as in [14]. Results reported in Figure 4 are averaged over 10 repeated  
 669 experiments. From the plots, we can see that 1) our proposed Syndicated Bandits framework  
 670 outperforms TL-combined method since now there are in total three hyper-parameters and the regret  
 671 of TL-combined depends on the number of hyper-parameters exponentially. 2) Tuning all 3 hyper-  
 672 parameters significantly outperforms tuning only the step size as in OP, Corral and TL. This further  
 673 indicates that tuning multiple hyper-parameters is better than tuning fewer. On the other hand, it  
 674 suggests that the theoretical choices of the exploration parameters do not always perform better than  
 675 the fine-tuned results. 3) Our proposed TL algorithm outperforms OP and Corral when tuning only  
 676 the step size.

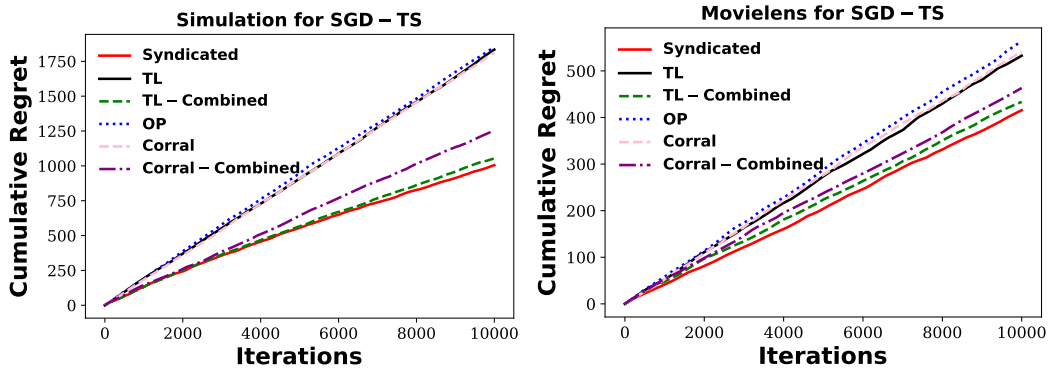

Figure 4: Comparison of hyper-parameters selection methods in SGD-TS.
